# Supplementary material for: Sex-Specific Effects of Diets High in Unsaturated Fatty Acids on Spatial Learning and Memory in Guinea Pigs
Source: PubMed Central journal article supplement (PMC4607430; doi:10.1371/journal.pone.0140485), 2015-10-15
Supplement: pone.0140485.s001.pdf [file pone.0140485.s001.pdf]

| Code | Group   | Sex    | Cort_Day01 | Cort_Day06 | Cort_Day11 | Cort_Day16 | Cort_Day17 |
|------|---------|--------|------------|------------|------------|------------|------------|
| Sm1  | Chia    | male   | 14.81      | 36.38      | 11.43      | 12.37      | 67.65      |
| Sm2  | Chia    | male   | 19.07      | 7.23       | 10.58      | 20.45      | 56.62      |
| Sm3  | Chia    | male   | 98.15      | 30.09      | 8.72       | 17.21      | 96.97      |
| Sm4  | Chia    | male   | 68.61      | 29.89      | 6.26       | 9.89       | 30.89      |
| Sm5  | Chia    | male   | 9.58       | 2.46       | 3.45       | 3.8        | 26.93      |
| Sm6  | Chia    | male   | 18.98      | 12.32      | 6.62       | 10.6       | 7.72       |
| Sm7  | Chia    | male   | 15.75      | 10.82      | 5.88       | 14.65      | 59.37      |
| Sm8  | Chia    | male   | 9.06       | 18.11      | 8.03       | 9.15       | 59.15      |
| Sm9  | Chia    | male   | 12.2       | 1.55       | 3.11       | 0.7        | 14.4       |
| Sm10 | Chia    | male   | 3.95       | 2.13       | 3.18       | 41.74      | 3.04       |
| Sf1  | Chia    | female | 38.26      | 108.05     | 9.45       | 50.28      | 40.29      |
| Sf2  | Chia    | female | 2.57       | 13.08      | 36.39      | 98.41      | 8.28       |
| Sf3  | Chia    | female | 13.83      | 53.13      | 7.86       | 11.98      | 14.38      |
| Sf4  | Chia    | female | 14.79      | 58.37      | 41.71      | 21.52      | 55.81      |
| Sf5  | Chia    | female | 33.82      | 13.33      | 24.83      | 26.21      | 21.94      |
| Sf6  | Chia    | female | 27.2       | 14         | 2.9        | 14.24      | 6          |
| Sf7  | Chia    | female | 2.94       | 4.55       | 5.21       | 5.87       | 4.24       |
| Sf8  | Chia    | female | 2.77       | 55.83      | 7.73       | 5.38       | 37.23      |
| Sf9  | Chia    | female | 9.93       | 3.38       | 6.55       | 6.54       | 5.47       |
| Sf10 | Chia    | female | 33.89      | 6.48       | 2.53       | 12.96      | 12.34      |
| Wm1  | Walnut  | male   | 14.81      | 33.7       | 39.19      | 42.64      | 89.66      |
| Wm2  | Walnut  | male   | 9.57       | 56.43      | 31.31      | 73.45      | 46.19      |
| Wm3  | Walnut  | male   | 25.89      | 77.56      | 23.23      | 76.67      | 35.53      |
| Wm4  | Walnut  | male   | 3.98       | 48.78      | 6.59       | 14.27      | 160.41     |
| Wm5  | Walnut  | male   | 74.77      | 12.77      | 33.21      | 7.6        | 47.13      |
| Wm6  | Walnut  | male   | 5.82       | 15.06      | 12.12      | 9.18       | 1.66       |
| Wm7  | Walnut  | male   | 12.78      | 6.81       | 4.93       | 102.54     | 96.42      |
| Wm8  | Walnut  | male   | 23.36      | 98.3       | 107.75     | 95.77      | 110.81     |
| Wm9  | Walnut  | male   | 39.55      | 7.21       | 2.7        | 11.22      | 41.96      |
| Wm10 | Walnut  | male   | 42.11      | 20.26      | 39.52      | 58.77      | 8.49       |
| Wf1  | Walnut  | female | 33.23      | 98.66      | 43.4       | 36.4       | 29.72      |
| Wf2  | Walnut  | female | 3.17       | 4.36       | 11.03      | 40.46      | 2.77       |
| Wf3  | Walnut  | female | 27.57      | 1.36       | 12.63      | 21.03      | 21.69      |
| Wf4  | Walnut  | female | 25.29      | 109.22     | 44.79      | 23.03      | 16.35      |
| Wf5  | Walnut  | female | 26.18      | 39.79      | 40.52      | 59.07      | 25.91      |
| Wf6  | Walnut  | female | 24.27      | 75.74      | 14.24      | 42.07      | 10.2       |
| Wf7  | Walnut  | female | 24.26      | 7.65       | 76.41      | 10.72      | 87.55      |
| Wf8  | Walnut  | female | 10.12      | 18.87      | 11.76      | 9.5        | 13.76      |
| Wf9  | Walnut  | female | 82.84      | 75.28      | 5.6        | 25.31      | 10.34      |
| Wf10 | Walnut  | female | 23.92      | 33.3       | 46.73      | 28.28      | 3.95       |
| Pm1  | Peanut  | male   | 21.02      | 54.43      | 63.73      | 75.28      | 70.3       |
| Pm2  | Peanut  | male   | 9.51       | 3.92       | 8.98       | 29.32      | 18.26      |
| Pm3  | Peanut  | male   | 53.14      | 23.56      | 34.57      | 34.23      | 38.13      |
| Pm4  | Peanut  | male   | 17.59      | 29.29      | 33.47      | 16.12      | 76.6       |
| Pm5  | Peanut  | male   | 47.69      | 3.36       | 26.65      | 27.97      | 34.19      |
| Pm6  | Peanut  | male   | 30.49      | 37.72      | 25.13      | 16.27      | 24.27      |
| Pm7  | Peanut  | male   | 14.26      | 4.12       | 3.96       | 25.55      | 89.99      |
| Pm8  | Peanut  | male   | 6.77       | 12.4       | 5.5        | 6.18       | 28.68      |
| Pm9  | Peanut  | male   | 9.52       | 4.75       | 9.87       | 3.51       | 10.44      |
| Pm10 | Peanut  | male   | 8.36       | 7.28       | 3.15       | 45.56      | 29.82      |
| Pf1  | Peanut  | female | 9.42       | 40.92      | 29.37      | 32.91      | 239.5      |
| Pf2  | Peanut  | female | 4.73       | 39.44      | 48.84      | 80.21      | 8.1        |
| Pf3  | Peanut  | female | 43.39      | 20.33      | 18.3       | 31.07      | 34.37      |
| Pf4  | Peanut  | female | 22.09      | 86.34      | 52.61      | 36.3       | 26.19      |
| Pf5  | Peanut  | female | 47.35      | 40.38      | 45.14      | 67.99      | 18.51      |
| Pf6  | Peanut  | female | 10.5       | 35.43      | 2.77       | 13.2       | 38.86      |
| Pf7  | Peanut  | female | 6.48       | 20.6       | 34.71      | 9.39       | 8.85       |
| Pf8  | Peanut  | female | 17.75      | 19.66      | 30.44      | 20.59      | 10.73      |
| Pf9  | Peanut  | female | 39.03      | 26.57      | 6.79       | 26.64      | 13.29      |
| Pf10 | Peanut  | female | 11.13      | 28.93      | 46.73      | 5.98       | 16.56      |
| Cm1  | Control | male   | 60.2       | 64.4       | 78.65      | 66.78      | 72.44      |
| Cm2  | Control | male   | 31.68      | 84.21      | 48.84      | 81.81      | 26.17      |
| Cm3  | Control | male   | 189.59     | 7.07       | 57.54      | 15.23      | 30.29      |
| Cm4  | Control | male   | 12.37      | 9.94       | 18.13      | 12.72      | 137.39     |
| Cm5  | Control | male   | 55.14      | 2.62       | 2.49       | 2.99       | 24.55      |
| Cm6  | Control | male   | 3.37       | 28.17      | 39.45      | 10.01      | 49.71      |
| Cm7  | Control | male   | 13.63      | 1.64       | 4.51       | 7.32       | 8.98       |
| Cm8  | Control | male   | 6.49       | 30.47      | 8.46       | 29.77      | 41.81      |
| Cm9  | Control | male   | 68.34      | 26.89      | 21.47      | 13.65      | 28.04      |
| Cm10 | Control | male   | 25.35      | 14.15      | 1.53       | 7.75       | 5.04       |
| Cf1  | Control | female | 16.87      | 116.61     | 6.99       | 17.68      | 23.45      |
| Cf2  | Control | female | 23.13      | 22.15      | 28.16      | 4.18       | 11.03      |
| Cf3  | Control | female | 99.55      | 41.98      | 34.18      | 56.65      | 33.94      |
| Cf4  | Control | female | 14.38      | 46.04      | 29.37      | 15.36      | 53.14      |
| Cf6  | Control | female | 8.31       | 29.43      | 12.43      | 12.43      | 7.72       |
| Cf7  | Control | female | 241.96     | 25.95      | 50.72      | 186.01     | 27.87      |
| Cf8  | Control | female | 16.84      | 25.02      | 27.13      | 14.67      | 7.6        |
| Cf9  | Control | female | 1.93       | 46.89      | 8.45       | 0.55       | 6.47       |
| Cf10 | Control | female | 2.59       | 2.03       | 1.46       | 8.74       | 11.01      |

| Cort_Day18 | Cort_Day19 | Cort_Day22 | Latency1 | Latency2 | Latency3 | Latency4 | Errors1 |
|------------|------------|------------|----------|----------|----------|----------|---------|
| 52.23      | 48.45      | 16.23      | 30.2     | 146.32   | 32.36    | 46.96    | 0       |
| 13.83      | 59.57      | 31.18      | 23.44    | 191.84   | 24.88    | 13.08    | 2       |
| 26.53      | 37.31      | 53.6       | 102.96   | 60.88    | 26.16    | 141.28   | 7       |
| 55.82      | 16.76      | 5.97       | 600      | 600      | 600      | 600      | 0       |
| 55.59      | 19.04      | 16.67      | 95.32    | 229.8    | 106.04   | 31.04    | 0       |
| 272.86     | 57.64      | 28.02      | 48.6     | 40.2     | 13.68    | 22.44    | 2       |
| 28.25      | 50.15      | 35.4       | 124.52   | 42.56    | 100.6    | 122.4    | 9       |
| 27.26      | 58.3       | 18.24      | 143.04   | 65.44    | 42.68    | 270.6    | 7       |
| 4.26       | 1.59       | 6.88       | 600      | 336.84   | 61.52    | 380      | 21      |
| 11.17      | 21.73      | 17.3       | 449.44   | 177.88   | 229.88   | 129.52   | 13      |
| 7.86       | 9.51       | 18.79      | 81.8     | 151.76   | 118.8    | 126.08   | 3       |
| 4.11       | 12.02      | 60.88      | 82.92    | 90.88    | 22.28    | 11.88    | 5       |
| 21.22      | 32.28      | 25.91      | 92.08    | 50.32    | 29.76    | 8.92     | 4       |
| 57.51      | 58.48      | 44.89      | 152.48   | 24.04    | 56.84    | 51.28    | 11      |
| 57.04      | 52.33      | 26.7       | 600      | 600      | 600      | 461.32   | 3       |
| 71.2       | 41.31      | 27.29      | 96.72    | 52.92    | 150.72   | 33.88    | 6       |
| 3.96       | 27.69      | 266.78     | 359.04   | 409.64   | 74.24    | 64.92    | 1       |
| 86.1       | 56.64      | 8.54       | 567.12   | 60       | 353.44   | 228.96   | 6       |
| 10.34      | 7.49       | 19.01      | 600      | 600      | 42.56    | 269.68   | 7       |
| 43.8       | 3.3        | 4.47       | 181.12   | 46.36    | 9.4      | 69.24    | 13      |
| 60.76      | 35.33      | 57.81      | 127.08   | 53.16    | 24.72    | 23.32    | 10      |
| 54.74      | 51.08      | 350.03     | 107.88   | 137.6    | 7.08     | 31.92    | 7       |
| 48.37      | 51.97      | 56.08      | 241.96   | 78.04    | 42.84    | 17.2     | 13      |
| 68.76      | 90.63      | 33.7       | 93.64    | 103.08   | 48.36    | 28.76    | 4       |
| 20.69      | 10.76      | 17.96      | 600      | 600      | 550.88   | 600      | 0       |
| 102.88     | 84.16      | 45.23      | 600      | 118.16   | 178.12   | 74.72    | 16      |
| 88.15      | 92.29      | 105.62     | 37.16    | 45.8     | 63.88    | 35.48    | 1       |
| 49.02      | 81.86      | 21.88      | 86.76    | 143.28   | 13.32    | 29.16    | 5       |
| 34.33      | 3.2        | 9.25       | 148      | 162.8    | 54.36    | 164.24   | 5       |
| 18.87      | 21.13      | 17.92      | 112.16   | 110.04   | 178.56   | 82.48    | 5       |
| 18.48      | 107.51     | 7.45       | 78.2     | 600      | 600      | 90.36    | 1       |
| 2.77       | 0.78       | 18.68      | 84.8     | 62.8     | 310.6    | 132.12   | 7       |
| 21.75      | 15.66      | 5.14       | 174.16   | 75.24    | 60.08    | 468.32   | 7       |
| 28.86      | 37.12      | 7.2        | 83.8     | 67.92    | 600      | 251.96   | 7       |
| 17.74      | 24.21      | 29.14      | 86.56    | 34.88    | 68.44    | 89.28    | 3       |
| 131.19     | 50.72      | 43.15      | 110.24   | 59.4     | 64       | 65.2     | 7       |
| 10.03      | 5.24       | 58.3       | 600      | 600      | 600      | 600      | 10      |
| 40.91      | 81.27      | 17.01      | 122.72   | 61.16    | 29.24    | 65.72    | 3       |
| 3.29       | 6.82       | 14.8       | 144.04   | 157.6    | 26.76    | 71.2     | 10      |
| 19.84      | 16.93      | 21.19      | 153.96   | 59.2     | 24.8     | 54.48    | 12      |
| 71.4       | 60.76      | 62.68      | 20.6     | 20.28    | 7.92     | 11.92    | 0       |
| 24.8       | 63.18      | 34.88      | 112.76   | 189.6    | 22.84    | 45.4     | 4       |
| 71.3       | 84.88      | 55.47      | 278.84   | 155.28   | 60.88    | 17.4     | 11      |
| 69.48      | 73.17      | 24.58      | 114.76   | 65.64    | 67.12    | 97.56    | 4       |
| 41.32      | 42.94      | 51.28      | 143.72   | 40.04    | 32.68    | 18.56    | 3       |
| 102.21     | 58.02      | 81.65      | 159.72   | 102.48   | 19.36    | 33.96    | 12      |
| 79.53      | 125.73     | 47.46      | 88.12    | 94.32    | 29.92    | 34.36    | 4       |
| 27.06      | 45.27      | 5.52       | 297.64   | 92.16    | 89.48    | 79.2     | 21      |
| 11.94      | 3.62       | 17.31      | 91.92    | 287.48   | 64.08    | 70.68    | 6       |
| 36.43      | 26.18      | 27.96      | 600      | 600      | 600      | 181      | 10      |
| 24.61      | 17.69      | 26.18      | 209.36   | 141.48   | 117      | 62.64    | 11      |
| 46.19      | 43.68      | 137.13     | 99.4     | 104.16   | 14.72    | 43.16    | 6       |
| 25.37      | 33.97      | 24.49      | 72.88    | 32.76    | 20.36    | 40.56    | 6       |
| 51.39      | 45.51      | 26.67      | 122.32   | 38.88    | 25.4     | 118.28   | 10      |
| 4.42       | 34.49      | 32.29      | 144.76   | 289.12   | 160.68   | 126.8    | 8       |
| 44.34      | 33.38      | 10.57      | 186.04   | 52.88    | 11.04    | 82.8     | 11      |
| 7.85       | 8.35       | 2.19       | 600      | 171.12   | 53.08    | 55.12    | 10      |
| 17.24      | 28.27      | 1.42       | 163.64   | 158.36   | 180.12   | 113.44   | 13      |
| 14.84      | 15.5       | 14.58      | 129      | 67.48    | 252.16   | 70.4     | 6       |
| 32.38      | 47.1       | 21.19      | 600      | 600      | 600      | 600      | 6       |
| 22.61      | 35.33      | 78.5       | 302.8    | 27.72    | 21.08    | 30.2     | 15      |
| 30.14      | 82.55      | 105.62     | 126.44   | 87.76    | 51.76    | 73.32    | 3       |
| 42.27      | 65.42      | 42.38      | 144.96   | 25.56    | 11.12    | 180.04   | 3       |
| 72.91      | 77.92      | 123.65     | 100.96   | 16.24    | 31.2     | 87.6     | 6       |
| 35.4       | 395.29     | 65.72      | 444.56   | 67.76    | 76.96    | 600      | 16      |
| 27.44      | 9.66       | 20.29      | 233.88   | 29.68    | 37.92    | 43.32    | 18      |
| 8.91       | 28.64      | 2.51       | 175.44   | 261.44   | 42.92    | 136.92   | 8       |
| 55.03      | 25.35      | 16.28      | 106.88   | 73       | 34.32    | 100      | 6       |
| 30.77      | 34.41      | 21.28      | 115.08   | 18.4     | 13.16    | 16       | 10      |
| 16.93      | 12.34      | 6.28       | 126.92   | 112.8    | 127.96   | 100.32   | 6       |
| 11.55      | 34.66      | 5.4        | 34.04    | 54.68    | 600      | 49.56    | 0       |
| 16.85      | 20.07      | 75.54      | 46.88    | 79.32    | 204.52   | 37.56    | 4       |
| 72.05      | 70.94      | 85.65      | 200.84   | 57.8     | 600      | 600      | 6       |
| 118.26     | 85.49      | 90.62      | 80.32    | 19.92    | 23.12    | 56.32    | 4       |
| 65.51      | 31.08      | 21.1       | 600      | 600      | 600      | 600      | 0       |
| 50.48      | 150.2      | 3          | 401.24   | 144.76   | 89.52    | 100.24   | 15      |
| 10.65      | 44.94      | 1.63       | 251.4    | 189.8    | 164.92   | 175.44   | 6       |
| 4.05       | 7.29       | 12.86      | 92.44    | 333.84   | 78.68    | 51.2     | 4       |
| 13.27      | 1.16       | 14.18      | 494.48   | 150.56   | 102.36   | 61       | 15      |

| Errors2 | Errors3 | Errors4 | Movement1 | Movement2 | Movement3 | Movement4 | C13:0       |
|---------|---------|---------|-----------|-----------|-----------|-----------|-------------|
| 2       | 3       | 6       | 29.93     | 17.33     | 50.56     | 55.71     | 0           |
| 4       | 0       | 0       | 65.53     | 22.89     | 46.3      | 52.91     | 0           |
| 5       | 3       | 14      | 55.48     | 59.2      | 65.14     | 54.93     | 0           |
| 0       | 1       | 1       | 0.94      | 0         | 3.46      | 0.71      | 0           |
| 6       | 5       | 0       | 20.56     | 29.35     | 41.27     | 46.01     | 0           |
| 2       | 0       | 2       | 45.84     | 40.9      | 55.85     | 52.58     |             |
| 1       | 10      | 9       | 52.3      | 33.08     | 51.77     | 48.73     | 0.210351247 |
| 3       | 6       | 7       | 40.02     | 38.88     | 70.76     | 13.51     | 0.604353866 |
| 17      | 3       | 8       | 28.06     | 33.42     | 33.55     | 14.92     | 0.36324994  |
| 9       | 2       | 2       | 23.22     | 42.32     | 11.17     | 16.09     | 0.142906621 |
| 6       | 4       | 6       | 39.31     | 29.73     | 28.32     | 46.92     | 0           |
| 6       | 0       | 0       | 31.55     | 39.48     | 58.53     | 59.93     | 0           |
| 4       | 2       | 0       | 40.27     | 53.02     | 61.16     | 77.58     | 0           |
| 1       | 3       | 3       | 41.74     | 58.57     | 50.81     | 40.48     | 0           |
| 1       | 1       | 7       | 11.83     | 1.81      | 1.92      | 18.62     | 0           |
| 4       | 13      | 4       | 45.04     | 63.64     | 45.3      | 70.37     | 0.06628352  |
| 9       | 4       | 3       | 9.64      | 17.23     | 42.94     | 48.68     | 0.193568759 |
| 3       | 0       | 1       | 7.57      | 27.53     | 2.42      | 7.02      | 0.794567215 |
| 3       | 0       | 4       | 10.88     | 3.87      | 40.32     | 12.43     | 0.864474492 |
| 2       | 1       | 5       | 45.87     | 42.8      | 68.09     | 29.29     | 0.083704966 |
| 4       | 5       | 4       | 35.06     | 44.32     | 81.88     | 72.21     | 0           |
| 10      | 0       | 4       | 34.07     | 40.12     | 71.75     | 61.03     | 0           |
| 6       | 6       | 3       | 35.53     | 47.82     | 61.81     | 64.42     |             |
| 3       | 2       | 2       | 33.87     | 29.3      | 21.42     | 32.96     | 0           |
| 0       | 0       | 5       | 1.63      | 0         | 3.61      | 10.61     | 0           |
| 6       | 15      | 7       | 14.67     | 40.96     | 52.64     | 43.68     |             |
| 4       | 11      | 9       | 48.55     | 46.64     | 53.66     | 63.81     | 0.156494113 |
| 12      | 1       | 6       | 41.68     | 39.45     | 56.46     | 62.69     | 0.537517279 |
| 5       | 4       | 8       | 40.62     | 23.69     | 57.17     | 33.41     | 0.260744448 |
| 4       | 9       | 10      | 29.49     | 26.9      | 34.36     | 45.93     | 0.226468264 |
| 5       | 2       | 3       | 25.32     | 4.31      | 1.6       | 33.47     | 0           |
| 5       | 4       | 3       | 46.18     | 38.22     | 7.34      | 19.68     | 0.123228589 |
| 5       | 2       | 9       | 40.06     | 60.87     | 34.35     | 12.17     | 0           |
| 5       | 6       | 5       | 53.46     | 44.05     | 6.62      | 16.4      | 0.070943549 |
| 2       | 3       | 5       | 37.2      | 40.25     | 32.85     | 34.27     | 0           |
| 4       | 4       | 3       | 41        | 34.41     | 43.19     | 38.22     | 0.172314319 |
| 13      | 6       | 5       | 15.13     | 12.29     | 5.06      | 4.34      | 0.256546113 |
| 5       | 1       | 3       | 19.69     | 45.45     | 28.73     | 26.9      | 0.977249795 |
| 9       | 3       | 4       | 47.6      | 30.99     | 56.2      | 38.2      | 0.154935939 |
| 6       | 3       | 5       | 47.03     | 52.16     | 54.84     | 40.31     | 0.339362313 |
| 1       | 0       | 0       | 63.88     | 60.16     | 88.89     | 77.18     | 0           |
| 8       | 0       | 3       | 27.03     | 27.34     | 38        | 51.71     | 0           |
| 13      | 5       | 0       | 24.95     | 41.4      | 43.1      | 33.8      | 0           |
| 2       | 6       | 8       | 35.59     | 33.94     | 62.04     | 39.77     | 0.06091989  |
| 4       | 2       | 3       | 24.52     | 67.33     | 47.74     | 63.79     | 0           |
| 7       | 1       | 4       | 39.27     | 45.67     | 66.74     | 61.37     | 0.112807713 |
| 7       | 3       | 5       | 62.14     | 42.58     | 47.33     | 54.02     | 0.372292948 |
| 3       | 2       | 3       | 42.92     | 31.51     | 30.26     | 30        | 0.052846673 |
| 13      | 5       | 6       | 52.79     | 26.02     | 43.7      | 43.29     | 0.08233183  |
| 6       | 5       | 10      | 12.09     | 4.54      | 4.99      | 49.79     | 0.090890089 |
| 5       | 4       | 6       | 25.75     | 24.88     | 23.32     | 35.31     | 0           |
| 9       | 0       | 3       | 44.63     | 46.12     | 63.59     | 51.81     | 0           |
| 0       | 0       | 2       | 59        | 49.08     | 65.42     | 47.93     | 0.071341215 |
| 2       | 4       | 12      | 50.39     | 60.29     | 74.49     | 50.39     | 0.082372323 |
| 7       | 6       | 4       | 52.31     | 27.49     | 40.38     | 29.53     | 0.093331951 |
| 5       | 0       | 5       | 38.21     | 53.03     | 47.83     | 42.22     |             |
| 4       | 4       | 4       | 10.01     | 14.98     | 34.89     | 34.03     | 0.361681612 |
| 6       | 5       | 0       | 36.01     | 20.31     | 12.28     | 4.41      | 0.753813399 |
| 6       | 6       | 8       | 41.33     | 49.73     | 16.39     | 47.22     | 0.298283508 |
| 9       | 2       | 4       | 9.49      | 12.42     | 2.55      | 3.93      | 0.213134434 |
| 3       | 3       | 4       | 33.91     | 78.35     | 84.44     | 72.32     | 0           |
| 4       | 4       | 7       | 23.09     | 35.32     | 63.83     | 49.37     | 0.143884892 |
| 1       | 0       | 6       | 21.22     | 37.72     | 46.4      | 21.57     | 0           |
| 0       | 3       | 3       | 37.48     | 46.8      | 61.28     | 29.59     | 0           |
| 3       | 4       | 13      | 28.84     | 47.99     | 53.74     | 13.13     | 0.175185491 |
| 1       | 3       | 3       | 43.06     | 48.65     | 66.14     | 55.12     | 0.481041306 |
| 8       | 3       | 2       | 48.4      | 21.79     | 39.98     | 20.42     | 0.442283092 |
| 3       | 4       | 4       | 38.32     | 39.51     | 64.8      | 21.6      | 0.937086697 |
| 1       | 2       | 3       | 39.28     | 61.74     | 62.61     | 62        | 0.206967842 |
| 6       | 6       | 8       | 51.91     | 47.02     | 31.1      | 47.33     | 0.122154546 |
| 6       | 4       | 2       | 26.44     | 59.33     | 2.45      | 28.33     | 0.204834084 |
| 5       | 9       | 4       | 51.79     | 36.16     | 29.63     | 60.17     | 0.365497076 |
| 7       | 9       | 3       | 31.97     | 69.34     | 8.72      | 2.61      | 0.176056338 |
| 2       | 4       | 7       | 37.7      | 72.29     | 73.88     | 61.36     | 0.11216478  |
| 0       | 0       | 0       | 0.87      | 0.03      | 0         | 0         | 0.071144143 |
| 10      | 6       | 6       | 26.2      | 39.71     | 35.84     | 37.39     | 0.288802729 |
| 1       | 5       | 5       | 13.75     | 6.43      | 15.38     | 11.24     | 0.847443624 |
| 12      | 6       | 5       | 42.67     | 22.91     | 44.23     | 60.31     | 0.260773197 |
| 6       | 7       | 6       | 21.19     | 24.81     | 33.06     | 41.64     | 0.245096507 |

| C14:0       | C14:1       | C15:0       | C16:0       | C16:1n7c    | C17:0       | C17:1       | C18:0       |
|-------------|-------------|-------------|-------------|-------------|-------------|-------------|-------------|
| 0.357781753 | 0.168367884 | 0.557718615 | 15.91076502 | 0.526149637 | 0.88393139  | 0           | 12.57497632 |
| 0.348682186 | 0.123064301 | 0.420469695 | 13.12685878 | 0.430725054 | 0.656342939 | 0           | 9.834888729 |
| 0.441826215 | 0.262991795 | 0.58910162  | 11.88722912 | 0.273511466 | 0.894172102 | 0           | 11.00357669 |
| 0.437773609 | 0.239733167 | 0.521159058 | 15.29080675 | 0.896393579 | 0.583698145 | 0           | 13.41463415 |
| 0.480217142 | 0.323624595 | 0.636809688 | 15.23123499 | 0.741204719 | 1.002192296 | 0           | 12.07850506 |
| 0.442268873 | 0.168533104 | 1.545461588 | 16.79711054 | 0.505495308 | 1.976984712 | 0.178018318 | 13.96743427 |
| 0.729038739 | 0.195938061 | 3.256895001 | 16.30073207 | 0.142885634 | 1.724267704 | 0.141684041 | 12.01191484 |
| 0.726001059 | 0.368071875 | 2.300373012 | 13.82343796 | 0.565259805 | 2.09451618  | 0.173821446 | 11.30521374 |
| 0.621067045 | 0.226815908 | 1.739351769 | 13.55879548 | 0.445219709 | 1.708901445 | 0.050622759 | 12.1535314  |
| 0.382323176 | 0.112447993 | 0.46103677  | 15.5965366  | 0.764646351 | 0.663443158 | 0.247385584 | 10.41268413 |
| 0.205973223 | 0.123583934 | 0.288362513 | 13.55303811 | 0.432543769 | 0.535530381 | 0           | 10.65911432 |
| 0.438825619 | 0.114930519 | 0.42837739  | 15.06634625 | 0.867203009 | 0.689583116 | 0           | 10.56315954 |
| 0.42646141  | 0.124817974 | 0.416059913 | 14.7701269  | 0.790513834 | 0.728104847 | 0           | 9.309340545 |
| 0.305778153 | 0.07380852  | 0.390130747 | 15.32053986 | 0.738085196 | 0.832981864 | 0           | 10.64951497 |
| 0.43701671  | 0.182155825 | 1.147406298 | 14.82846111 | 0.541017811 | 1.822407852 | 0.14731592  | 13.66386044 |
| 1.054938145 | 0.403153481 | 1.78399175  | 17.4821744  | 1.026184601 | 1.38677559  | 0.202079309 | 11.3259122  |
| 0.74059619  | 0.39903899  | 3.848062124 | 13.46039842 | 0.38891336  | 1.989080027 | 0.196173821 | 13.25754445 |
| 0.827336335 | 0.42983326  | 2.802219455 | 15.1369577  | 0.536123887 | 2.063961362 | 0.169620195 | 12.32520515 |
| 0.41889039  | 0.153629132 | 1.522178968 | 12.8017079  | 0.256921366 | 1.426623025 | 0.029584936 | 14.10608053 |
| 0.159151194 | 0.148541114 | 0.562334218 | 12.79575597 | 0.381962865 | 1.092838196 | 0           | 13.82493369 |
| 0.103348491 | 0.072343944 | 0.248036379 | 9.88011575  | 0.248036379 | 0.423728814 | 0.144687888 | 9.022323274 |
| 0.568527919 | 0.081218274 | 0.355329949 | 16.12182741 | 1.197969543 | 0.578680203 | 0.14213198  | 8.040609137 |
| 0.133456524 | 0.14372241  | 0.379837799 | 13.1916641  | 0.687814393 | 0.872600349 | 0.164254183 | 12.07268248 |
| 0.718106492 | 0.238358052 | 1.438204097 | 17.00032613 | 0.439207691 | 1.496281248 | 0.131188112 | 12.55447092 |
| 0.808492363 | 0.244468985 | 3.256751066 | 13.02016978 | 0.30232194  | 2.12745387  | 0.120248816 | 11.75559703 |
| 1.053727918 | 0.438357938 | 1.962346288 | 15.97756066 | 0.695912627 | 1.492901671 | 0.196126099 | 12.07181799 |
| 0.870080685 | 0.294891297 | 2.635674775 | 1.790977479 | 0.429082421 | 1.143826632 | 0.096766322 | 13.61928693 |
| 0.414057766 | 0.161583518 | 0.424156736 | 15.31003838 | 0.777620683 | 0.616037164 | 0.100989699 | 8.281155322 |
| 0.45183816  | 0.11295954  | 0.472376258 | 13.23680427 | 0.605873896 | 0.759909632 | 0.11295954  | 8.975148901 |
| 0.182463254 | 0.111505322 | 0.385200203 | 11.84997466 | 0.385200203 | 0.881905727 | 0.111505322 | 11.44450076 |
| 0.374987332 | 0.22296544  | 0.648626736 | 11.76649438 | 0.344582953 | 0.668896321 | 0.070943549 | 9.526705179 |
| 0.162651215 | 0.081325607 | 0.284639626 | 14.41496391 | 0.782758971 | 0.66077056  | 0.193148318 | 7.268476161 |
| 0.649689094 | 0.196492914 | 1.296503679 | 14.83878861 | 0.574548404 | 1.465683186 | 0.051635169 | 11.80128669 |
| 0.658082701 | 0.230534718 | 1.638036158 | 17.51844253 | 0.522351276 | 1.366078783 | 0.197228398 | 13.84981607 |
| 1.138431238 | 0.461648768 | 3.644929962 | 13.79013337 | 0.643351365 | 2.761373051 | 0.159047101 | 11.74207003 |
| 0.415384896 | 0.13043223  | 1.452856218 | 12.31161338 | 0.247937413 | 2.025946159 | 0.071775313 | 9.988342423 |
| 0.493417003 | 0.184969333 | 2.165419766 | 13.07656406 | 0.359437837 | 1.438256007 | 0.120264589 | 12.3533849  |
| 0.336528656 | 0.132571895 | 0.438507037 | 13.38976137 | 0.305935142 | 0.713848664 | 0.214154599 | 10.45278401 |
| 0.202839757 | 0.14198783  | 0.365111562 | 11.01419878 | 0.172413793 | 0.618661258 | 0.111561866 | 10.50709939 |
| 0.222536921 | 0.13149909  | 0.4855351   | 11.15719199 | 0.202306292 | 0.799109852 | 0.101153146 | 10.4693506  |
| 0.324906082 | 0.142146411 | 0.426439232 | 13.07746979 | 0.629505534 | 0.761498629 | 0.213219616 | 11.96060514 |
| 0.355871886 | 0.193187595 | 0.538891713 | 12.98423996 | 0.4473818   | 0.843924759 | 0.2236909   | 12.7808846  |
| 0.459583722 | 0.139687221 | 1.338648879 | 14.91732743 | 0.313500669 | 1.678643321 | 0.105841788 | 13.12077958 |
| 0.774295093 | 0.285541819 | 2.928869347 | 18.25589755 | 0.695173296 | 1.389151513 | 0.156151348 | 12.33896304 |
| 0.296528705 | 0.130856719 | 0.986770226 | 12.66757677 | 0.301419513 | 1.12960004  | 0.140492052 | 11.96741287 |
| 0.324791859 | 0.17056936  | 1.336084655 | 12.23902527 | 0.315884116 | 1.436740711 | 0.090390074 | 10.3645693  |
| 0.423506752 | 0.137368237 | 1.18135036  | 13.01686385 | 0.278186745 | 0.913095914 | 0.063251672 | 11.6854646  |
| 0.332761924 | 0.121004336 | 0.373096703 | 13.48189977 | 0.484017344 | 0.494101039 | 0.141171725 | 10.22486639 |
| 0.317622951 | 0.112704918 | 0.389344262 | 13.97540984 | 0.727459016 | 0.717213115 | 0.204918033 | 11.42418033 |
| 0.305748064 | 0.132490824 | 0.377089278 | 13.0044843  | 0.509580106 | 0.570729719 | 0.19364044  | 11.80187525 |
| 0.27800659  | 0.102965404 | 0.391268534 | 12.36614498 | 0.339785832 | 0.545716639 | 0           | 11.4291598  |
| 0.497770403 | 0.145183034 | 0.487400187 | 15.44125272 | 0.798506689 | 0.632583221 | 0.311106502 | 7.829513637 |
| 0.701699183 | 0.172758702 | 1.30701353  | 16.60719344 | 0.782091358 | 5.43004823  | 0.157966854 | 12.05682482 |
| 0.750189451 | 0.262794133 | 2.58659728  | 13.02627529 | 0.516410782 | 2.683166237 | 0.152486413 | 12.44360298 |
| 0.58761683  | 0.29010036  | 1.904359682 | 13.15171789 | 0.378805765 | 1.660987743 | 0.130440719 | 10.63080615 |
| 0.536334487 | 0.207909717 | 2.707079991 | 13.07750488 | 0.448482087 | 1.448374487 | 0.132667913 | 12.92727302 |
| 0.525394046 | 0           | 0.752034614 | 15.21582363 | 0.329659009 | 0.659318018 | 0           | 9.807355517 |
| 0.503597122 | 0.154162384 | 0.431654676 | 14.43987667 | 0.441932169 | 0.637204522 | 0.22610483  | 9.362795478 |
| 0           | 0           | 0           | 4.860073698 | 0           | 0.527835873 | 0           | 22.25873917 |
| 0           | 0.050362611 | 0.161160355 | 8.632151491 | 0.171232877 | 0.916599517 | 0           | 14.19218372 |
| 0.5358615   | 0.195795548 | 0.5358615   | 16.43652102 | 0.89653751  | 1.34995878  | 0.391591096 | 11.94352844 |
| 0.848688001 | 0.209244545 | 2.595946401 | 17.6609787  | 0.686812213 | 1.957655476 | 0.118119721 | 13.26847178 |
| 1.290846634 | 0.418449423 | 2.957471664 | 18.18181818 | 0.514086    | 2.213830674 | 0.145626238 | 14.91650934 |
| 0.935730031 | 0.408758288 | 3.759832582 | 15.33582169 | 0.594351912 | 1.745340133 | 0.113544355 | 11.11150186 |
| 0.540364611 | 0.41759315  | 1.785285733 | 13.90306178 | 0.333148957 | 2.174165529 | 0.130689503 | 10.93389133 |
| 0.562710692 | 0.1996938   | 1.681953867 | 14.0904305  | 0.265612832 | 2.528188763 | 0.091175655 | 13.31190076 |
| 0.604260549 | 0.286767718 | 0.727161    | 14.95288816 | 0.757886112 | 0.65546907  | 0.235559197 | 9.463334699 |
| 0.584795322 | 0.167084378 | 0.459482038 | 15.44486216 | 0.824979114 | 0.626566416 | 0.250626566 | 10.68295739 |
| 0.621375311 | 0.176056338 | 0.569594035 | 14.75766363 | 0.57995029  | 0.869925435 | 0           | 8.688898094 |
| 0.50983991  | 0.214132762 | 0.50983991  | 15.47873968 | 0.723972673 | 0.815743856 | 0.28551035  | 10.74742531 |
| 0.577896995 | 0.288415869 | 0.981857275 | 17.67499291 | 0.765422759 | 1.50402667  | 0.148764171 | 13.01000329 |
| 0.661570258 | 0.270484693 | 1.867787562 | 18.72931454 | 0.72759906  | 1.493068129 | 0.150652287 | 12.14597755 |
| 0.83627728  | 0.378427514 | 4.028860786 | 14.28799561 | 0.303642082 | 3.106785995 | 0.163585158 | 12.59762059 |
| 1.0538441   | 0.438406271 | 1.962562651 | 15.9793223  | 0.695989357 | 1.493066274 | 0.196147723 | 12.06212327 |
| 1.116772568 | 0.42581294  | 2.723006993 | 15.59669869 | 0.655160883 | 1.670448259 | 0.155723219 | 12.14355559 |

| C18:1n9c    | C18:1n7c    | C18:2n6t    | C18:2n6c    | C18:3n6     | C20:0       | C18:3n3     | C20:1n9     |
|-------------|-------------|-------------|-------------|-------------|-------------|-------------|-------------|
| 13.49047669 | 0           | 0.368304746 | 45.7960644  | 0           | 0           | 5.84026097  | 0.220982848 |
| 10.49123167 | 1.415239463 | 0.287150036 | 49.22572044 | 0           | 0.256383961 | 9.455440468 | 0.184596452 |
| 11.7083947  | 0           | 0.231432779 | 46.42331159 | 0           | 0           | 14.14895855 | 0           |
| 14.6549927  | 0           | 0.239733167 | 39.05565979 | 0           | 0.114654993 | 10.92349385 | 0.229309985 |
| 13.40432195 | 0           | 0.386261614 | 41.54922226 | 0           | 0.125274037 | 10.72136966 | 0.187911055 |
| 13.99266993 | 1.108172451 | 0.135884001 | 39.08772383 | 0.156605865 | 0.076476613 | 5.330885427 | 0.021183643 |
| 12.16260445 | 1.009996342 | 0.090232522 | 35.77265037 | 0.114966375 | 0.053728893 | 11.92822088 | 0.047148394 |
| 10.3766914  | 1.035547136 | 0.095196692 | 39.9113172  | 0.114633072 | 0.114731325 | 13.23411131 | 0.078297245 |
| 11.57270467 | 1.017687941 | 0.058351281 | 40.07613787 | 0.071028416 | 0.082429528 | 12.55875205 | 0.0445402   |
| 13.76363432 | 0           | 0.337343978 | 46.9245474  | 0           | 0.146182391 | 6.904306758 | 0.112447993 |
| 12.87332647 | 0           | 0.216271885 | 49.52626159 | 0           | 0.308959835 | 8.383110196 | 0.195674562 |
| 13.7498694  | 0           | 0.208964581 | 46.49461916 | 0           | 0.156723435 | 7.940654059 | 0.125378748 |
| 11.82650302 | 0           | 0.228832952 | 48.72061577 | 0           | 0.176825463 | 9.746203453 | 0.124817974 |
| 15.49978912 | 0           | 0.137072965 | 45.57148882 | 0.168705188 | 0           | 4.997891185 | 0.115984817 |
| 11.18170798 | 1.013433096 | 0.115570834 | 40.25480776 | 0.173379441 | 0.013850791 | 9.002841478 | 0.22656901  |
| 14.1628065  | 1.038598823 | 0.108624933 | 38.09815592 | 0.143465791 | 0.111170891 | 7.547481041 | 0.023599295 |
| 10.71742346 | 0.933356248 | 0.348463073 | 39.24545327 | 0.14060411  | 0.09989266  | 8.76365442  | 0.102752386 |
| 1.229895937 | 0.780486436 | 0.127233917 | 49.55585286 | 0.155763292 | 0.146859352 | 8.586049853 | 0.117773319 |
| 12.5631326  | 0.941022005 | 0.071794479 | 38.45325873 | 0.20935593  | 0.131933512 | 11.72681406 | 0.01906018  |
| 10.85411141 | 1.326259947 | 0           | 48.77453581 | 0.106100796 | 0.233421751 | 5.432360743 | 0.084880637 |
| 13.84869781 | 0.992145515 | 0.144687888 | 55.15708971 | 0.134353038 | 0.155022737 | 6.97602315  | 0.175692435 |
| 15.02538071 | 0.994923858 | 0.14213198  | 48.26395939 | 0.131979695 | 0.14213198  | 4.964467005 | 0.152284264 |
| 12.49358382 | 1.067652192 | 0.277178934 | 48.32152756 | 0.133456524 | 0.236115389 | 5.779694077 | 0.164254183 |
| 12.34757184 | 1.175928342 | 0.156344932 | 40.51438709 | 0.148538798 | 0.137639437 | 5.8417162   | 0.102390053 |
| 10.40967593 | 0.909171531 | 0.084321487 | 44.48463979 | 0.161918507 | 0.048952294 | 7.580658383 | 0.039820865 |
| 11.88952766 | 1.043617214 | 0.069543857 | 42.28327037 | 0.109969524 | 0.151410671 | 6.15439557  | 0.440974423 |
| 12.22153671 | 1.188835058 | 0.099663437 | 52.68974453 | 0.11682189  | 0.126885552 | 8.161409831 | 0.019867211 |
| 16.57240961 | 1.07049081  | 0.141385579 | 47.29347607 | 0.131286609 | 0.131286609 | 6.38254898  | 0.141385579 |
| 11.22407065 | 1.037173958 | 0.174573834 | 56.14089135 | 0.123228589 | 0.123228589 | 3.296364757 | 0.11295954  |
| 11.62710086 | 1.003547897 | 0.192600101 | 51.89256412 | 0.141915864 | 0.152052712 | 6.842372022 | 0.111505322 |
| 11.81716834 | 0.841187798 | 0.22296544  | 52.2347218  | 0.091213135 | 0.273639404 | 7.205837641 | 0.233100233 |
| 19.8332825  | 1.108061401 | 0.172816916 | 47.05702958 | 0.142319813 | 0.162651215 | 4.361085697 | 0.142319813 |
| 11.6606496  | 0.936373891 | 0.081521876 | 44.56724239 | 0.144920961 | 0.010373145 | 7.458620374 | 0.008305581 |
| 12.26420782 | 1.021711384 | 0.098250989 | 39.48275489 | 0.206132621 | 0.06639192  | 5.784822454 | 0.004936857 |
| 11.23368243 | 0.955554605 | 0.105598002 | 41.28983983 | 0.156173606 | 0.061566428 | 6.564480348 | 0.092472835 |
| 11.35425749 | 0.984746249 | 0.091785036 | 50.10037664 | 0.137558643 | 0.091339464 | 6.790785993 | 0.201589756 |
| 11.30794922 | 0.970404796 | 0.112827772 | 46.89142158 | 0.113637448 | 0.074828465 | 5.627332948 | 0.10078523  |
| 17.09157659 | 0.805629207 | 0.234550275 | 48.34795023 | 0.091780543 | 0.275341628 | 3.161329798 | 0.193758923 |
| 19.35091278 | 1.064908722 | 0.212981744 | 47.94117647 | 0           | 0.446247465 | 4.929006085 | 0.294117647 |
| 20.24074449 | 0.839571111 | 0.202306292 | 47.20817317 | 0.11126846  | 0.323690067 | 4.65304471  | 0.404612583 |
| 17.04741598 | 1.076251396 | 0.203066301 | 46.33972992 | 0           | 0.233526246 | 4.030866078 | 0.172606356 |
| 15.72953737 | 1.159125572 | 0.162684291 | 44.73817997 | 0           | 0.172852059 | 5.043213015 | 0.152516523 |
| 17.80366818 | 0.894758343 | 0.109361622 | 38.44827096 | 0.200363947 | 0.065401983 | 4.156725829 | 0.294951341 |
| 13.13804319 | 1.022940116 | 0.085501261 | 38.73031808 | 0.199044087 | 0.088295487 | 4.577178474 | 0.045183593 |
| 22.06976627 | 0.885197635 | 0.083016776 | 41.60935354 | 0.146862247 | 0.207323897 | 2.938119878 | 0.352019505 |
| 20.70482468 | 1.02550391  | 0.122906215 | 43.78452995 | 0.102328657 | 0.172613917 | 3.79938515  | 0.2477562   |
| 20.95667544 | 0.957863756 | 0.14542546  | 41.58992505 | 0.060813085 | 0.181628589 | 4.671419692 | 0.202261012 |
| 18.49349602 | 0.826862963 | 0.211757588 | 47.61520621 | 0.090753252 | 0.292427145 | 3.15619643  | 0.262176061 |
| 13.27868852 | 0.901639344 | 0.194672131 | 50.19467213 | 0.112704918 | 0           | 2.612704918 | 0.194672131 |
| 16.57154505 | 0.845902976 | 0           | 46.96290257 | 0.183448838 | 0.214023645 | 3.332653893 | 0.254790053 |
| 12.77800659 | 0.978171334 | 0.247116969 | 51.00906096 | 0           | 0.247116969 | 4.901153213 | 0.175041186 |
| 17.09011718 | 1.04739189  | 0.238514985 | 43.17121228 | 0.114072384 | 0.311106502 | 5.382142487 | 0.248885202 |
| 12.72114801 | 0.996566659 | 0.1226494   | 38.15271207 | 0.13597272  | 0.063479408 | 4.866939125 | 0.095012478 |
| 16.3401207  | 0.81818355  | 0.174374581 | 41.18840893 | 0.178851082 | 0.110193091 | 2.999925551 | 0.14039186  |
| 20.29878534 | 1.083504231 | 0.112069615 | 40.7278664  | 0.126779948 | 0.184450754 | 3.692156793 | 0.45505362  |
| 14.36813085 | 1.02230833  | 0.125425894 | 42.46358335 | 0.131683783 | 0.083366598 | 4.512817901 | 0.14667787  |
| 12.52704234 | 0.999278871 | 0.236942413 | 48.16112084 | 0           | 0.216338725 | 5.171525703 | 0.288451633 |
| 14.16238438 | 1.130524152 | 0.287769784 | 49.76361768 | 0.102774923 | 0.277492292 | 4.964028777 | 0           |
| 14.44079275 | 0.627427547 | 0           | 45.50343591 | 0           | 0.667264217 | 6.124887959 | 0.527835873 |
| 14.68573731 | 1.369863014 | 0.322320709 | 48.37832393 | 0           | 0.352538276 | 7.020547945 | 0.241740532 |
| 12.58244023 | 1.154163232 | 0.247320692 | 43.36356142 | 0.133965375 | 0.185490519 | 4.85366859  | 0.185490519 |
| 9.856086849 | 0.948482212 | 0.054973857 | 41.23768781 | 0.070392636 | 0.057198697 | 3.024508772 | 0.520727414 |
| 11.66838237 | 1.019665663 | 0.145649461 | 35.40676963 | 0.197692719 | 0.099790218 | 5.269798691 | 0.126453803 |
| 11.75022205 | 0.991151797 | 0.188853237 | 41.98570833 | 0.145246701 | 0.084202275 | 6.067912632 | 0.081825329 |
| 12.53081304 | 1.067075674 | 0.127733673 | 46.53938841 | 0.042074305 | 0.17555244  | 6.135008121 | 0.172826508 |
| 11.10194628 | 1.045489486 | 0.076543713 | 45.44312677 | 0.127161532 | 0.095663955 | 5.152802776 | 0.059732456 |
| 12.59729619 | 1.085620647 | 0.297009422 | 49.77468251 | 0.143383859 | 0.163867268 | 4.414174519 | 0.174108972 |
| 12.32247285 | 1.117376775 | 0.208855472 | 47.0342523  | 0           | 0.187969925 | 4.166666667 | 0.177527151 |
| 10.82228666 | 0.994200497 | 0.258906379 | 51.73985087 | 0.27961889  | 0.196768848 | 3.769676885 | 0.144987572 |
| 13.74528398 | 1.091057408 | 0.316100744 | 45.53890079 | 0.142755175 | 0.214132762 | 6.322014887 | 0.152951973 |
| 13.93784487 | 1.004749357 | 0.127087294 | 39.02213447 | 0.065855347 | 0.006154121 | 4.994216375 | 0.096469759 |
| 12.79484397 | 0.993795712 | 0.075983731 | 39.93847134 | 0.205090425 | 0.045352673 | 4.75520447  | 0.028525461 |
| 11.74140171 | 0.985260752 | 0.104739356 | 41.94845454 | 0.150977039 | 0.054891302 | 3.739120268 | 0.0864739   |
| 11.89083857 | 1.043732281 | 0.069551525 | 42.28793241 | 0.109981649 | 0.151427365 | 6.155074137 | 0.441023044 |
| 12.01123675 | 0.98024774  | 0.193141691 | 40.58585896 | 0.113117504 | 0.106672435 | 7.274940912 | 0.112177445 |

| C20:2n6     | C20:4n6     | C20:5n3     | C24:0       | C22:5n3     | C22:6n3     | total_n9    | total_n6    |
|-------------|-------------|-------------|-------------|-------------|-------------|-------------|-------------|
| 0.34725876  | 2.409765337 | 0           | 0           | 0.368304746 | 0.178890877 | 13.71145954 | 48.92139324 |
| 0.184596452 | 2.902266434 | 0           | 0           | 0.461491129 | 0.19485181  | 10.67582812 | 52.59973336 |
| 0.284031138 | 1.693667158 | 0           | 0.157795077 | 0           | 0           | 11.7083947  | 48.63244267 |
| 0.281425891 | 2.053366688 | 0.135501355 | 0.239733167 | 0.375234522 | 0.312695435 | 14.88430269 | 41.63018553 |
| 0.240108571 | 2.150537634 | 0.062637018 | 0.062637018 | 0.323624595 | 0.292306086 | 13.59223301 | 44.32613008 |
| 0.356818749 | 2.276367999 | 0.066438095 | 0.161019817 | 0.30611446  | 0.346888397 | 14.1531406  | 42.1367831  |
| 0.340521242 | 2.215117528 | 0.071716321 | 0.075470615 | 0.317432058 | 0.167375157 | 12.34683838 | 38.63390948 |
| 0.320699006 | 1.858775441 | 0.14476387  | 0.091266588 | 0.308979235 | 0.130189734 | 10.5012757  | 42.40177373 |
| 0.33758067  | 2.383521279 | 0.051059716 | 0.035846618 | 0.349987052 | 0.141349122 | 11.68880943 | 43.1033783  |
| 0.224895986 | 2.552569437 | 0           | 0.056223996 | 0.337343978 | 0           | 13.87608231 | 50.0393568  |
| 0.339855819 | 1.894953656 | 0           | 0.144181256 | 0.226570546 | 0.092687951 | 13.06900103 | 51.97734295 |
| 0.261205726 | 2.131438721 | 0           | 0.052241145 | 0.376136245 | 0.334343329 | 13.87524815 | 49.09622819 |
| 0.218431454 | 1.986686083 | 0           | 0.072810485 | 0.291241939 | 0           | 11.95132099 | 51.15456626 |
| 0.253057782 | 3.078869675 | 0.105440742 | 0           | 0.811893716 | 0.948966681 | 15.61577394 | 49.20919443 |
| 0.399235883 | 2.830363878 | 0.237582181 | 0.156553997 | 0.566027239 | 0.405773372 | 11.45220108 | 43.97173191 |
| 0.250175899 | 1.884522992 | 0.136673323 | 0.065051461 | 0.259837682 | 0.320930928 | 14.33455054 | 40.60034541 |
| 0.508471531 | 2.784419536 | 0.103838075 | 0.026907164 | 0.374426322 | 0.234840745 | 10.85866368 | 43.2632167  |
| 0.354446219 | 2.351194351 | 0.084958971 | 0.08351166  | 0.394709428 | 0.243404579 | 1.420037398 | 52.69006321 |
| 0.218375935 | 3.313504342 | 0.100087199 | 0.093507101 | 0.619481357 | 0.267063558 | 12.6129339  | 42.29876484 |
| 0.190981432 | 3.129973475 | 0           | 0           | 0.286472149 | 0.519893899 | 11.03448276 | 52.20159151 |
| 0.206696982 | 1.674245556 | 0           | 0           | 0.217031831 | 0.175692435 | 14.02439024 | 57.31707317 |
| 0.203045685 | 2.538071066 | 0           | 0           | 0.223350254 | 0.131979695 | 15.17766497 | 51.27918782 |
| 0.256647161 | 2.381685659 | 0           | 0           | 0.513294323 | 0.266913048 | 13.11980289 | 51.37049584 |
| 0.317649377 | 3.107964802 | 0.133495854 | 0.065365717 | 0.384223766 | 0.441962976 | 12.60635858 | 44.38121225 |
| 0.25215409  | 2.355272689 | 0.11900106  | 0.084198053 | 0.387520881 | 0.279038541 | 10.49546521 | 47.42390264 |
| 0.336394661 | 1.813283838 | 0.101257708 | 0.113325876 | 0.265096681 | 0.167745326 | 12.46695126 | 44.80953156 |
| 0.472906887 | 2.441621905 | 0.082684371 | 0.061260971 | 0.330176898 | 0.207511447 | 12.28818829 | 55.95548346 |
| 0.262573218 | 1.474449606 | 0           | 0           | 0.141385579 | 0.090890729 | 16.79458695 | 49.30317108 |
| 0.256726227 | 2.105155063 | 0           | 0.082152393 | 0.164304785 | 0.236188129 | 11.40891353 | 58.80057507 |
| 0.253421186 | 1.844906234 | 0           | 0           | 0.192600101 | 0.364926508 | 11.83983781 | 54.2524075  |
| 0.263504611 | 2.118171683 | 0           | 0.091213135 | 0.202695855 | 0.121617513 | 12.567143   | 54.93057667 |
| 0.315136729 | 2.094134391 | 0           | 0           | 0.376130934 | 0.386296635 | 19.97560232 | 49.78143743 |
| 0.300689194 | 2.376718267 | 0.160890659 | 0.033179561 | 0.284193309 | 0.392111947 | 11.69561411 | 47.60264514 |
| 0.294342262 | 2.50547287  | 0.195250303 | 0.134217121 | 0.343059844 | 0.356995917 | 12.38202463 | 42.78957709 |
| 0.261764186 | 2.39388025  | 0.136547451 | 0.080122443 | 0.383369756 | 0.217167116 | 11.40139009 | 44.35337076 |
| 0.230628456 | 2.282111614 | 0.0801373   | 0.072800401 | 0.29551791  | 0.173073168 | 11.6405004  | 52.93984378 |
| 0.419467535 | 2.770527667 | 0.057905686 | 0.075003156 | 0.274532789 | 0.169701953 | 11.46595524 | 50.52304504 |
| 0.305935142 | 2.926779523 | 0           | 0.112176219 | 0.193758923 | 0.101978381 | 17.38731389 | 51.90699572 |
| 0.202839757 | 1.825557809 | 0           | 0.182555781 | 0.14198783  | 0.070993915 | 19.7464503  | 50.18255578 |
| 0.252882865 | 1.58810439  | 0           | 0.101153146 | 0.121383775 | 0.050576573 | 20.97916245 | 49.36273518 |
| 0.182759671 | 2.132196162 | 0.071073205 | 0.111686466 | 0.416285917 | 0.233526246 | 17.37232206 | 48.85775206 |
| 0.2236909   | 3.324860193 | 0.101677682 | 0.091509914 | 0.284697509 | 0.264361973 | 16.06507372 | 48.44941535 |
| 0.392879883 | 3.01424319  | 0.325191852 | 0.216391815 | 0.345530878 | 0.725789276 | 18.28819422 | 42.30258033 |
| 0.311552775 | 2.64857697  | 0.140625587 | 0.098999838 | 0.29001395  | 0.362044028 | 13.34773341 | 42.14148591 |
| 0.256019455 | 2.584149018 | 0.096342297 | 0.177487759 | 0.341594797 | 0.210964403 | 22.49479462 | 44.7793728  |
| 0.295551329 | 2.259684657 | 0.081799093 | 0.156216663 | 0.325382189 | 0.172916281 | 21.00835746 | 46.68661838 |
| 0.349643932 | 2.080833027 | 0.0376531   | 0.025786409 | 0.258480326 | 0.166232538 | 21.27752098 | 44.33290363 |
| 0.242008672 | 2.541091056 | 0           | 0.080669557 | 0.231924977 | 0.121004336 | 18.93717858 | 50.70081678 |
| 0.379098361 | 3.329918033 | 0           | 0.12295082  | 0.379098361 | 0.297131148 | 13.54508197 | 54.21106557 |
| 0.468813698 | 3.189971464 | 0           | 0.101916021 | 0.591112923 | 0.315939666 | 16.8263351  | 50.80513657 |
| 0.28830313  | 2.985996705 | 0           | 0.267710049 | 0.27800605  | 0.226523888 | 13.0354201  | 54.53047776 |
| 0.207404335 | 3.43254174  | 0.103702167 | 0.362957586 | 0.95405994  | 1.099242974 | 17.33900239 | 47.16374572 |
| 0.260103643 | 3.540977682 | 0.074876746 | 0.123564306 | 0.246676357 | 0.347643522 | 12.87357864 | 42.4428289  |
| 0.317033946 | 3.172963988 | 0.083294681 | 0.078316678 | 0.45888255  | 0.352137881 | 16.55541186 | 45.16426544 |
| 0.343700608 | 1.800559375 | 0.074596095 | 0.163589402 | 0.196225325 | 0.124812966 | 21.14722897 | 43.26180308 |
| 0.379373931 | 3.404677743 | 0.099488674 | 0.108689145 | 0.52478976  | 0.33580411  | 14.59603377 | 46.74917839 |
| 0.401771917 | 3.883795199 | 0           | 0           | 0.53569589  | 0.288451633 | 12.81549397 | 52.68363037 |
| 0.277492292 | 2.137718397 | 0           | 0           | 0.184994861 | 0.143884892 | 14.16238438 | 52.56937307 |
| 0.677223384 | 2.718852704 | 0           | 0           | 0.288815855 | 0.776815058 | 14.96862862 | 48.899512   |
| 0.352538276 | 2.326752619 | 0           | 0.221595488 | 0.251813054 | 0.161160355 | 15.11885576 | 51.37993554 |
| 0.26793075  | 3.122423743 | 0.154575433 | 0           | 0.659521847 | 0.463726298 | 12.93281121 | 47.13520198 |
| 0.250660787 | 3.510561315 | 0.286100447 | 0.165523241 | 0.603610706 | 0.634544531 | 10.61154285 | 45.24001619 |
| 0.332888409 | 2.865564074 | 0.204473902 | 0.126974667 | 0.303693492 | 0.415357416 | 11.86789313 | 39.25518391 |
| 0.367044968 | 1.985613248 | 0.133218797 | 0.084788867 | 0.398035619 | 0.203745987 | 11.91309012 | 44.86443477 |
| 0.318098108 | 1.482447473 | 0.095891318 | 0.102582243 | 0.231128023 | 0.086256505 | 12.74805463 | 48.52788002 |
| 0.347669667 | 2.714555699 | 0.112491943 | 0.04719617  | 0.327629177 | 0.166205141 | 11.21281942 | 48.81941184 |
| 0.276526014 | 1.730848013 | 0           | 0.215075789 | 0.256042605 | 0.153625563 | 12.77140516 | 52.22244982 |
| 0.323725982 | 2.882205514 | 0           | 0           | 0.386382623 | 0.386382623 | 12.5        | 50.44903926 |
| 0.362468931 | 4.173570837 | 0           | 0           | 0.455675228 | 0.362468931 | 10.96727423 | 56.81441591 |
| 0.214132762 | 2.182114816 | 0           | 0.101967982 | 0.336494341 | 0.244723157 | 13.89823595 | 48.39400428 |
| 0.261431452 | 3.138720645 | 0.238458148 | 0.06526805  | 0.573595358 | 0.753520626 | 14.17496911 | 42.66183496 |
| 0.345783391 | 2.701096816 | 0.130448216 | 0.098073838 | 0.308833346 | 0.420871311 | 12.94377928 | 43.3967817  |
| 0.293795883 | 2.975370825 | 0.075844513 | 0.076770098 | 0.452050031 | 0.248896144 | 11.89662695 | 45.62486834 |
| 0.336431751 | 1.813483766 | 0.101268873 | 0.113338371 | 0.26512591  | 0.167763821 | 12.46832584 | 44.81447214 |
| 0.368204529 | 1.999473361 | 0.122835861 | 0.072506656 | 0.287630136 | 0.134600576 | 12.26923369 | 43.44276921 |

| total_n3     | total_PUFA  | total_MUFA  | total_SFA   | n6:n3 ratio  | M:S ratio   | P:S ratio   |
|--------------|-------------|-------------|-------------|--------------|-------------|-------------|
| 6.387456593  | 55.30884984 | 14.40597706 | 30.2851731  | 7.658978583  | 0.475677554 | 1.826268242 |
| 10.11178341  | 62.71151677 | 12.64485694 | 24.64362629 | 5.201825558  | 0.513108614 | 2.544735747 |
| 14.14895855  | 62.78140122 | 12.24489796 | 24.97370082 | 3.437174721  | 0.49031171  | 2.51390059  |
| 11.74692516  | 53.37711069 | 16.02042944 | 30.60245987 | 3.543921917  | 0.523501362 | 1.744209809 |
| 11.39993736  | 55.72606744 | 14.65706232 | 29.61687024 | 3.888278388  | 0.494888967 | 1.881565033 |
| 6.050326379  | 48.18710948 | 16.63578287 | 35.17710765 | 6.96438183   | 0.472915028 | 1.369842852 |
| 12.48474442  | 51.1186539  | 14.12494437 | 34.75640173 | 3.094489417  | 0.406398352 | 1.470769451 |
| 13.81804415  | 56.21981787 | 12.96139232 | 30.81878981 | 3.068579987  | 0.420567855 | 1.824205889 |
| 13.10114794  | 56.20452624 | 13.75264386 | 30.0428299  | 3.290045918  | 0.457767924 | 1.870813316 |
| 7.241650737  | 57.28100753 | 15.00056224 | 27.71843023 | 6.909937888  | 0.541176471 | 2.06653144  |
| 8.702368692  | 60.67971164 | 13.62512873 | 25.69515963 | 5.972781065  | 0.530260521 | 2.361523046 |
| 8.651133633  | 57.74736182 | 14.85738167 | 27.3952565  | 5.675120773  | 0.542334096 | 2.107932876 |
| 10.03744539  | 61.19201165 | 12.8666528  | 25.94133555 | 5.096373057  | 0.495990377 | 2.358861267 |
| 6.864192324  | 56.07338676 | 16.42766765 | 27.49894559 | 7.168970814  | 0.597392638 | 2.039110429 |
| 10.21222427  | 54.18395618 | 13.68020311 | 32.13584072 | 4.305793796  | 0.425699244 | 1.686091136 |
| 8.264922975  | 48.86526838 | 17.73114842 | 33.4035832  | 4.912368274  | 0.530815761 | 1.462875048 |
| 9.476759562  | 52.73997627 | 13.04297548 | 34.21704825 | 4.56519092   | 0.381183537 | 1.541336233 |
| 9.309122831  | 61.99918604 | 3.750288459 | 34.2505255  | 5.660045974  | 0.109495793 | 1.810167439 |
| 12.71344617  | 55.01221101 | 14.4031626  | 30.58462639 | 3.327088836  | 0.470928185 | 1.798688345 |
| 6.23872679   | 58.4403183  | 12.89124668 | 28.66843501 | 8.367346939  | 0.449666913 | 2.038490007 |
| 7.368747416  | 64.68582059 | 15.48160397 | 19.83257544 | 7.778401122  | 0.780614904 | 3.261594581 |
| 5.319796954  | 56.59898477 | 17.59390863 | 25.8071066  | 9.639312977  | 0.681746656 | 2.193154996 |
| 6.559901447  | 57.93039729 | 15.18324607 | 26.88635664 | 7.830985915  | 0.564719359 | 2.154639175 |
| 6.801398796  | 51.18261105 | 15.25050079 | 33.56688816 | 6.525306571  | 0.454331683 | 1.524794637 |
| 8.366218865  | 55.7901215  | 12.57074677 | 31.63913173 | 5.668498924  | 0.397316427 | 1.763326566 |
| 6.688495285  | 51.49802684 | 15.41813763 | 33.08383552 | 6.69949363   | 0.466032351 | 1.556591793 |
| 8.781782548  | 64.737266   | 14.78827271 | 20.47446128 | 6.371768277  | 0.722278965 | 3.161854425 |
| 6.614825288  | 55.91799636 | 18.90527166 | 25.17673197 | 7.453435115  | 0.750902527 | 2.221018853 |
| 3.696857671  | 62.49743274 | 13.27788047 | 24.22468679 | 15.90555556  | 0.548113607 | 2.57990674  |
| 7.399898632  | 61.65230613 | 13.45159655 | 24.89609731 | 7.331506849  | 0.540309446 | 2.476384365 |
| 7.530151008  | 62.46072768 | 14.04682274 | 23.49244958 | 7.294751009  | 0.597929249 | 2.65875755  |
| 5.123513266  | 54.9049507  | 22.14089661 | 22.95415269 | 9.716269841  | 0.964570416 | 2.39193977  |
| 8.295816289  | 55.89846143 | 15.89846143 | 30.26781828 | 5.738150832  | 0.457043853 | 1.846795197 |
| 6.680128518  | 49.46970561 | 15.04268299 | 35.4876114  | 6.405502076  | 0.423885474 | 1.393999305 |
| 7.30156467   | 51.65493543 | 14.14918825 | 34.19587632 | 6.074502214  | 0.413768845 | 1.510560365 |
| 7.339514369  | 60.27935814 | 13.20742297 | 26.51321888 | 7.212990003  | 0.498144832 | 2.273558651 |
| 6.129473376  | 56.65251841 | 13.33124592 | 30.01623566 | 8.242640426  | 0.444134503 | 1.887395843 |
| 3.457067102  | 55.36406282 | 18.84560473 | 25.79033245 | 15.01474926  | 0.730723606 | 2.1466983   |
| 5.14198783   | 55.32454361 | 21.23732252 | 23.43813387 | 9.759368836  | 0.906101255 | 2.360450022 |
| 4.825005058  | 54.18774024 | 22.25369209 | 23.55856767 | 10.23060797  | 0.944611421 | 2.300128811 |
| 4.751751447  | 53.6095035  | 19.43344502 | 26.95705148 | 10.28205128  | 0.720903955 | 1.988700565 |
| 5.693950178  | 54.14336553 | 18.08845958 | 27.76817489 | 8.508928571  | 0.65140974  | 1.949835225 |
| 5.553237835  | 47.85581817 | 20.23459738 | 31.90958445 | 7.617642462  | 0.634122874 | 1.499731789 |
| 5.36986204   | 47.51134795 | 16.24188724 | 36.24676481 | 7.847778136  | 0.448092053 | 1.310774857 |
| 3.587021374  | 48.36639418 | 24.14805889 | 27.48554693 | 12.48372065  | 0.878572981 | 1.75970281  |
| 4.379482713  | 51.06610109 | 22.82152471 | 26.1123742  | 10.6603043   | 0.873973563 | 1.95562842  |
| 5.133785656  | 49.46668928 | 23.01472415 | 27.51858656 | 8.63551901   | 0.836333803 | 1.797573766 |
| 3.509125744  | 54.20994252 | 20.51023495 | 25.27982253 | 14.44827586  | 0.811328281 | 2.144395692 |
| 3.288934426  | 57.5        | 15.49180328 | 27.00819672 | 16.48286604  | 0.573596358 | 2.128983308 |
| 4.239706482  | 55.04484305 | 18.50794945 | 26.4472075  | 11.98317308  | 0.699807322 | 2.081310212 |
| 5.40568369   | 59.93616145 | 14.45634267 | 25.60749588 | 10.08761905  | 0.564535585 | 2.340570969 |
| 7.539147568  | 54.70289329 | 19.6411905  | 25.65591621 | 6.255845942  | 0.765561843 | 2.132174616 |
| 5.53613575   | 47.97896465 | 15.36953083 | 36.65150452 | 7.666507979  | 0.419342426 | 1.30905853  |
| 3.894240663  | 49.0585061  | 18.50933949 | 32.43215441 | 11.59770783  | 0.570709526 | 1.512650238 |
| 4.087791179  | 47.34959426 | 24.06859377 | 28.58181196 | 10.58317345  | 0.842094749 | 1.656633747 |
| 5.472900445  | 52.22207883 | 16.67616412 | 31.10175704 | 8.541938386  | 0.536180773 | 1.67907166  |
| 5.995673226  | 58.6793036  | 14.14443185 | 27.17626455 | 8.786941581  | 0.520470053 | 2.159211524 |
| 5.29290853   | 57.8622816  | 16.11510791 | 26.02261048 | 9.932038835  | 0.619273302 | 2.223538705 |
| 7.190518873  | 56.09003087 | 15.59605617 | 28.31391296 | 6.800554017  | 0.550826592 | 1.98100598  |
| 7.433521354  | 58.81345689 | 16.71031426 | 24.47622885 | 6.911924119  | 0.682716049 | 2.402880658 |
| 6.131492168  | 53.26669415 | 15.5708986  | 31.16240725 | 7.687394958  | 0.499669312 | 1.709325397 |
| 4.548764456  | 49.78878064 | 13.17571576 | 37.0355036  | 9.945561399  | 0.355759055 | 1.344352737 |
| 6.193323501  | 45.44850741 | 14.32196812 | 40.22952447 | 6.338306712  | 0.356006398 | 1.129730167 |
| 6.802913035  | 51.6673478  | 14.33834805 | 33.99430414 | 6.594885829  | 0.421786779 | 1.519882495 |
| 6.548283967  | 55.07616399 | 15.1019645  | 29.82187151 | 7.410778192  | 0.506405659 | 1.846837948 |
| 5.759129037  | 54.57854088 | 12.98125986 | 32.44019926 | 8.476874112  | 0.400159683 | 1.682435439 |
| 4.823842687  | 57.0462925  | 15.13723884 | 27.81646866 | 10.82590234  | 0.544182622 | 2.050810015 |
| 4.939431913  | 55.38847118 | 14.86006683 | 29.75146199 | 10.213353066 | 0.499473499 | 1.861705862 |
| 4.587821044  | 61.40223695 | 12.71748136 | 25.88028169 | 12.38374718  | 0.491396559 | 2.37254902  |
| 6.903232385  | 55.29723667 | 16.21290915 | 28.48985419 | 7.010339734  | 0.569076593 | 1.940944882 |
| 6.559790507  | 49.22162547 | 16.88703107 | 33.89134346 | 6.50353619   | 0.498269745 | 1.452336215 |
| 5.6153957342 | 49.01213904 | 15.65791368 | 35.32994728 | 7.728231536  | 0.443190972 | 1.387268955 |
| 4.515910957  | 50.1407793  | 14.02257542 | 35.83664529 | 10.10313728  | 0.39129152  | 1.399148243 |
| 6.689232741  | 51.50370488 | 15.41983759 | 33.07645753 | 6.69949363   | 0.466187698 | 1.557110668 |
| 7.820007485  | 51.26277669 | 15.0624656  | 33.6747577  | 5.553336013  | 0.447292472 | 1.522290885 |
