# Supplementary material for: Sex-Specific Effects of Diets High in Unsaturated Fatty Acids on Spatial Learning and Memory in Guinea Pigs
Source: PubMed Central journal article supplement (PMC4607430; doi:10.1371/journal.pone.0140485), 2015-10-15
Supplement: pone.0140485.s002.pdf [file pone.0140485.s002.pdf]

**S1 Table. Model statistics for behaviors of the spatial cognition test and saliva cortisol concentrations.**

| Response variable         | Predictor     | Statistics |             |         |
|---------------------------|---------------|------------|-------------|---------|
|                           |               | df         | F-statistic | p-value |
| Latency - Learning phase  | Group         | 3,71       | 0.382       | 0.766   |
|                           | Sex           | 1,71       | 0.006       | 0.940   |
|                           | Day           | 2,142      | 0.775       | 0.463   |
|                           | Group:Sex     | 3,71       | 0.436       | 0.728   |
|                           | Group:Day     | 6,142      | 1.739       | 0.116   |
|                           | Sex:Day       | 2,142      | 6.577       | 0.002   |
|                           | Group:Sex:Day | 6,142      | 2.121       | 0.050   |
| Errors - Learning phase   | Group         | 3,71       | 1.402       | 0.249   |
|                           | Sex           | 1,71       | 3.648       | 0.060   |
|                           | Day           | 2,142      | 0.070       | 0.932   |
|                           | Group:Sex     | 3,71       | 1.914       | 0.135   |
|                           | Group:Day     | 6,142      | 1.895       | 0.086   |
|                           | Sex:Day       | 2,142      | 4.866       | 0.009   |
|                           | Group:Sex:Day | 6,142      | 2.374       | 0.032   |
| Movement - Learning phase | Group         | 3,71       | 0.784       | 0.507   |
|                           | Sex           | 1,71       | 1.069       | 0.305   |
|                           | Day           | 2,142      | 1.789       | 0.171   |
|                           | Group:Sex     | 3,71       | 0.678       | 0.569   |
|                           | Group:Day     | 6,142      | 1.916       | 0.082   |
|                           | Sex:Day       | 2,142      | 4.979       | 0.008   |
|                           | Group:Sex:Day | 6,142      | 2.013       | 0.068   |
| Latency - Retention test  | Group         | 3,71       | 1.507       | 0.220   |
|                           | Sex           | 1,71       | 10.503      | 0.002   |
|                           | Day           | 1,71       | 2.042       | 0.157   |
|                           | Group:Sex     | 3,71       | 1.707       | 0.173   |
|                           | Group:Day     | 3,71       | 1.027       | 0.386   |
|                           | Sex:Day       | 1,71       | 9.457       | 0.003   |
|                           | Group:Sex:Day | 3,71       | 3.125       | 0.031   |
| Errors - Retention test   | Group         | 3,75       | 2.036       | 0.116   |
|                           | Sex           | 1,74       | 0.166       | 0.685   |
|                           | Day           | 1,78       | 7.744       | 0.007   |
|                           | Group:Sex     | 3,71       | 0.368       | 0.776   |
|                           | Group:Day     | 3,74       | 0.313       | 0.816   |
|                           | Sex:Day       | 1,77       | 0.534       | 0.467   |
|                           | Group:Sex:Day | 3,71       | 1.081       | 0.363   |
| Movement - Retention test | Group         | 3,71       | 1.209       | 0.313   |
|                           | Sex           | 1,71       | 11.189      | 0.001   |
|                           | Day           | 1,71       | 1.499       | 0.225   |
|                           | Group:Sex     | 3,71       | 1.930       | 0.133   |
|                           | Group:Day     | 3,71       | 0.641       | 0.591   |

|                                |                 |       |        |        |
|--------------------------------|-----------------|-------|--------|--------|
|                                | Sex:Day         | 1,71  | 11.004 | 0.001  |
|                                | Group:Sex:Day   | 3,71  | 3.395  | 0.023  |
| Saliva cortisol concentrations | Group           | 3,74  | 0.355  | 0.786  |
|                                | Sex             | 1,74  | 12.95  | <0.001 |
|                                | Day             | 3,542 | 1.548  | 0.201  |
|                                | Stage           | 1,542 | 0.382  | 0.537  |
|                                | Group:Sex       | 3,71  | 0.583  | 0.628  |
|                                | Group:Day       | 9,524 | 0.751  | 0.662  |
|                                | Group:Stage     | 3,542 | 3.033  | 0.029  |
|                                | Sex:Day         | 3,539 | 1.819  | 0.143  |
|                                | Sex:Stage       | 1,542 | 29.288 | <0.001 |
|                                | Day:Stage       | 3,542 | 2.481  | 0.06   |
|                                | Group:Sex:Day   | 9,515 | 0.938  | 0.492  |
|                                | Group:Sex:Stage | 3,533 | 1.042  | 0.373  |
|                                | Group:Day:Stage | 9,506 | 0.59   | 0.806  |
|                                | Sex:Day:Stage   | 3,536 | 1.145  | 0.331  |

Bright model statistics indicate predictors that were removed during model simplification based on the AIC (values for each predictor at the last appearance in the model).
