# Supplementary material for: Sex-Specific Effects of Diets High in Unsaturated Fatty Acids on Spatial Learning and Memory in Guinea Pigs
Source: PubMed Central journal article supplement (PMC4607430; doi:10.1371/journal.pone.0140485), 2015-10-15
Supplement: pone.0140485.s003.pdf [file pone.0140485.s003.pdf]

**S2 Table. Plasma fatty acids (% on total fatty acids) for single male and female groups.**

| Fatty Acid    | Group                      |                            |                           |                           |                            |                            |                            |                            |
|---------------|----------------------------|----------------------------|---------------------------|---------------------------|----------------------------|----------------------------|----------------------------|----------------------------|
|               | Chia (n-3)                 |                            | Walnut (n-6)              |                           | Peanut (n-9)               |                            | Control                    |                            |
|               | males                      | females                    | males                     | females                   | males                      | females                    | males                      | females                    |
| <b>SFAs</b>   |                            |                            |                           |                           |                            |                            |                            |                            |
| 13:0          | 0.15 ± 0.07                | 0.20 ± 0.11                | 0.15 ± 0.07               | 0.21 ± 0.09               | 0.08 ± 0.04                | 0.21 ± 0.08                | 0.25 ± 0.09                | 0.29 ± 0.08                |
| 14:0          | 0.51 ± 0.05                | 0.52 ± 0.08                | 0.55 ± 0.13               | 0.49 ± 0.09               | 0.47 ± 0.05                | 0.48 ± 0.06                | 0.57 ± 0.12                | 0.63 ± 0.17                |
| 15:0          | 1.29 ± 0.33                | 1.31 ± 0.38                | 1.35 ± 0.41               | 1.24 ± 0.33               | 1.00 ± 0.25                | 1.17 ± 0.33                | 1.47 ± 0.41                | 1.54 ± 0.41                |
| 16:0          | 14.66 ± 0.55               | 14.80 ± 0.42               | 12.47 ± 1.73              | 12.81 ± 0.56              | 13.27 ± 0.66               | 13.79 ± 0.46               | 13.88 ± 1.30               | 14.88 ± 0.48               |
| 17:0          | 1.28 ± 0.20                | 1.21 ± 0.19                | 1.15 ± 0.19               | 1.26 ± 0.22               | 1.03 ± 0.21                | 1.58 ± 0.54                | 1.47 ± 0.24                | 1.36 ± 0.26                |
| 18:0          | 12.04 ± 0.41               | 11.63 ± 0.51               | 11.62 ± 0.73              | 11.52 ± 0.65              | 11.56 ± 0.33               | 11.20 ± 0.51               | 13.11 ± 1.17               | 12.28 ± 0.49               |
| 20:0          | 0.09 ± 0.03                | 0.13 ± 0.03                | 0.15 ± 0.02               | 0.11 ± 0.02               | 0.22 ± 0.04                | 0.17 ± 0.04                | 0.22 ± 0.06                | 0.13 ± 0.03                |
| 24:0          | 0.09 ± 0.03                | 0.08 ± 0.02                | 0.04 ± 0.02               | 0.06 ± 0.01               | 0.13 ± 0.05                | 0.16 ± 0.06                | 0.07 ± 0.03                | 0.08 ± 0.02                |
| <b>MUFAs</b>  |                            |                            |                           |                           |                            |                            |                            |                            |
| 14:1          | 0.23 ± 0.03                | 0.21 ± 0.04                | 0.21 ± 0.04               | 0.19 ± 0.03               | 0.16 ± 0.02                | 0.17 ± 0.02                | 0.21 ± 0.05                | 0.29 ± 0.03                |
| 16:1 n-7c     | 0.50 ± 0.08                | 0.63 ± 0.08                | 0.55 ± 0.11               | 0.52 ± 0.06               | 0.37 ± 0.05                | 0.55 ± 0.06                | 0.42 ± 0.08                | 0.67 ± 0.05                |
| 17:1          | 0.06 ± 0.03 <sup>a</sup>   | 0.10 ± 0.03 <sup>a</sup>   | 0.12 ± 0.02 <sup>ab</sup> | 0.12 ± 0.02 <sup>ab</sup> | 0.14 ± 0.02 <sup>b</sup>   | 0.16 ± 0.03 <sup>b</sup>   | 0.12 ± 0.04 <sup>b</sup>   | 0.18 ± 0.03 <sup>b</sup>   |
| 18:1 n-9t     | 0.04 ± 0.02 <sup>a</sup>   | 0.03 ± 0.02 <sup>a</sup>   | 0.12 ± 0.05 <sup>b</sup>  | 0.11 ± 0.05 <sup>b</sup>  | 0.15 ± 0.03 <sup>b</sup>   | 0.10 ± 0.04 <sup>b</sup>   | 0.08 ± 0.03 <sup>ab</sup>  | 0.07 ± 0.02 <sup>ab</sup>  |
| 18:1 n-7t     | 0.16 ± 0.07                | 0.22 ± 0.08                | 0.28 ± 0.11               | 0.20 ± 0.08               | 0.19 ± 0.08                | 0.21 ± 0.11                | 0.18 ± 0.07                | 0.28 ± 0.09                |
| 18:1 n-9c     | 12.43 ± 0.51 <sup>a</sup>  | 11.76 ± 1.26 <sup>a</sup>  | 12.39 ± 0.53 <sup>a</sup> | 12.89 ± 0.92 <sup>a</sup> | 18.41 ± 0.87 <sup>b</sup>  | 15.77 ± 0.89 <sup>c</sup>  | 12.53 ± 0.49 <sup>a</sup>  | 12.43 ± 0.33 <sup>a</sup>  |
| 18:1 n-7c     | 0.62 ± 0.20 <sup>a</sup>   | 0.47 ± 0.16 <sup>a</sup>   | 1.09 ± 0.05 <sup>b</sup>  | 0.99 ± 0.02 <sup>b</sup>  | 0.97 ± 0.04 <sup>b</sup>   | 0.95 ± 0.03 <sup>b</sup>   | 1.04 ± 0.06 <sup>b</sup>   | 1.03 ± 0.02 <sup>b</sup>   |
| 20:1 n-9      | 0.11 ± 0.03 <sup>a</sup>   | 0.12 ± 0.02 <sup>a</sup>   | 0.15 ± 0.05 <sup>a</sup>  | 0.11 ± 0.02 <sup>a</sup>  | 0.24 ± 0.03 <sup>b</sup>   | 0.22 ± 0.02 <sup>b</sup>   | 0.18 ± 0.06 <sup>ab</sup>  | 0.16 ± 0.04 <sup>ab</sup>  |
| <b>PUFAs</b>  |                            |                            |                           |                           |                            |                            |                            |                            |
| 18:2 n-6t     | 0.21 ± 0.04                | 0.19 ± 0.03                | 0.12 ± 0.05               | 0.14 ± 0.06               | 0.16 ± 0.02                | 0.16 ± 0.03                | 0.17 ± 0.03                | 0.18 ± 0.03                |
| 18:2 n-6c     | 41.88 ± 1.44 <sup>a</sup>  | 44.28 ± 1.50 <sup>a</sup>  | 47.56 ± 1.76 <sup>b</sup> | 47.69 ± 1.61 <sup>b</sup> | 43.87 ± 1.16 <sup>a</sup>  | 44.61 ± 1.50 <sup>a</sup>  | 44.58 ± 1.35 <sup>a</sup>  | 44.21 ± 1.51 <sup>a</sup>  |
| 18:3 n-6      | 0.05 ± 0.02 <sup>a</sup>   | 0.06 ± 0.03 <sup>a</sup>   | 0.13 ± 0.01 <sup>b</sup>  | 0.14 ± 0.01 <sup>b</sup>  | 0.09 ± 0.02 <sup>ab</sup>  | 0.12 ± 0.02 <sup>ab</sup>  | 0.08 ± 0.02 <sup>ab</sup>  | 0.10 ± 0.03 <sup>ab</sup>  |
| 20:2 n-6      | 0.30 ± 0.02                | 0.30 ± 0.03                | 0.28 ± 0.03               | 0.29 ± 0.02               | 0.28 ± 0.02                | 0.32 ± 0.03                | 0.36 ± 0.04                | 0.31 ± 0.02                |
| 20:3 n-6      | 0.06 ± 0.02                | 0.07 ± 0.03                | 0.07 ± 0.03               | 0.08 ± 0.03               | 0.06 ± 0.02                | 0.08 ± 0.04                | 0.07 ± 0.03                | 0.08 ± 0.03                |
| 20:4 n-6      | 2.22 ± 0.12                | 2.48 ± 0.16                | 2.43 ± 0.19               | 2.20 ± 0.21               | 2.44 ± 0.18                | 3.04 ± 0.58                | 2.67 ± 0.23                | 2.62 ± 0.26                |
| 18:3 n-3      | 10.46 ± 1.03 <sup>a</sup>  | 8.36 ± 0.56 <sup>a</sup>   | 6.36 ± 0.39 <sup>b</sup>  | 6.03 ± 0.42 <sup>b</sup>  | 4.20 ± 0.23 <sup>c</sup>   | 3.94 ± 0.33 <sup>c</sup>   | 5.38 ± 0.34 <sup>b</sup>   | 5.07 ± 0.42 <sup>b</sup>   |
| 20:5 n-3      | 0.06 ± 0.02                | 0.08 ± 0.02                | 0.05 ± 0.02               | 0.06 ± 0.02               | 0.09 ± 0.03                | 0.05 ± 0.02                | 0.10 ± 0.03                | 0.07 ± 0.03                |
| 22:5 n-3      | 0.31 ± 0.04                | 0.43 ± 0.06                | 0.33 ± 0.04               | 0.27 ± 0.03               | 0.27 ± 0.03                | 0.43 ± 0.08                | 0.38 ± 0.05                | 0.37 ± 0.04                |
| 22:6 n-3      | 0.20 ± 0.04                | 0.28 ± 0.09                | 0.27 ± 0.05               | 0.25 ± 0.04               | 0.24 ± 0.06                | 0.36 ± 0.10                | 0.33 ± 0.07                | 0.32 ± 0.06                |
| <b>Totals</b> |                            |                            |                           |                           |                            |                            |                            |                            |
| total n-9     | 12.58 ± 0.52 <sup>a</sup>  | 11.91 ± 1.25 <sup>a</sup>  | 12.65 ± 0.53 <sup>a</sup> | 13.12 ± 0.92 <sup>a</sup> | 18.80 ± 0.89 <sup>b</sup>  | 16.10 ± 0.95 <sup>c</sup>  | 12.84 ± 0.48 <sup>a</sup>  | 12.65 ± 0.32 <sup>a</sup>  |
| total n-6     | 44.71 ± 1.47 <sup>a</sup>  | 47.43 ± 1.40 <sup>a</sup>  | 50.59 ± 1.69 <sup>b</sup> | 50.53 ± 1.55 <sup>b</sup> | 46.90 ± 1.07 <sup>a</sup>  | 48.34 ± 1.49 <sup>a</sup>  | 47.94 ± 1.29 <sup>a</sup>  | 47.54 ± 1.61 <sup>a</sup>  |
| total n-3     | 11.03 ± 1.00 <sup>a</sup>  | 9.15 ± 0.53 <sup>a</sup>   | 7.01 ± 0.40 <sup>b</sup>  | 6.61 ± 0.42 <sup>b</sup>  | 4.79 ± 0.24 <sup>c</sup>   | 4.77 ± 0.45 <sup>c</sup>   | 6.19 ± 0.27 <sup>b</sup>   | 5.83 ± 0.40 <sup>b</sup>   |
| total PUFA    | 55.74 ± 1.59 <sup>ac</sup> | 56.58 ± 1.30 <sup>ac</sup> | 57.61 ± 1.82 <sup>a</sup> | 57.14 ± 1.43 <sup>a</sup> | 51.69 ± 1.01 <sup>b</sup>  | 53.11 ± 1.44 <sup>bc</sup> | 54.13 ± 1.34 <sup>bc</sup> | 53.36 ± 1.40 <sup>bc</sup> |
| total MUFA    | 14.16 ± 0.49 <sup>a</sup>  | 13.54 ± 0.19 <sup>a</sup>  | 14.90 ± 0.56 <sup>a</sup> | 15.14 ± 0.95 <sup>a</sup> | 20.63 ± 0.79 <sup>b</sup>  | 18.14 ± 1.01 <sup>c</sup>  | 14.81 ± 0.39 <sup>a</sup>  | 15.11 ± 0.40 <sup>a</sup>  |
| total UFA     | 69.90 ± 1.21 <sup>ab</sup> | 71.12 ± 1.08 <sup>ab</sup> | 72.51 ± 1.88 <sup>a</sup> | 72.28 ± 1.42 <sup>a</sup> | 72.32 ± 1.22 <sup>ab</sup> | 71.25 ± 1.30 <sup>ab</sup> | 68.93 ± 1.57 <sup>b</sup>  | 68.47 ± 1.20 <sup>b</sup>  |
| total SFA     | 30.10 ± 1.21 <sup>ab</sup> | 29.88 ± 1.08 <sup>ab</sup> | 27.50 ± 1.88 <sup>a</sup> | 27.72 ± 1.42 <sup>a</sup> | 27.68 ± 1.22 <sup>ab</sup> | 28.75 ± 1.30 <sup>ab</sup> | 31.07 ± 1.57 <sup>b</sup>  | 31.53 ± 1.20 <sup>b</sup>  |
| <b>Ratios</b> |                            |                            |                           |                           |                            |                            |                            |                            |
| n6:n3 ratio   | 4.46 ± 0.58 <sup>a</sup>   | 5.36 ± 0.37 <sup>a</sup>   | 7.36 ± 0.45 <sup>b</sup>  | 8.14 ± 0.93 <sup>b</sup>  | 10.10 ± 0.72 <sup>c</sup>  | 10.85 ± 1.08 <sup>c</sup>  | 7.89 ± 0.42 <sup>b</sup>   | 8.56 ± 0.79 <sup>b</sup>   |
| M:S ratio     | 0.47 ± 0.01 <sup>a</sup>   | 0.46 ± 0.04 <sup>a</sup>   | 0.56 ± 0.05 <sup>ac</sup> | 0.56 ± 0.05 <sup>ac</sup> | 0.76 ± 0.05 <sup>b</sup>   | 0.64 ± 0.05 <sup>bc</sup>  | 0.49 ± 0.03 <sup>a</sup>   | 0.48 ± 0.02 <sup>a</sup>   |
| P:S ratio     | 1.89 ± 0.13 <sup>ab</sup>  | 1.92 ± 0.10 <sup>ab</sup>  | 2.21 ± 0.24 <sup>a</sup>  | 2.12 ± 0.14 <sup>a</sup>  | 1.91 ± 0.10 <sup>ab</sup>  | 1.89 ± 0.12 <sup>ab</sup>  | 1.80 ± 0.13 <sup>b</sup>   | 1.73 ± 0.12 <sup>b</sup>   |
| U:S ratio     | 2.37 ± 0.14 <sup>ab</sup>  | 2.39 ± 0.12 <sup>ab</sup>  | 2.77 ± 0.28 <sup>a</sup>  | 2.69 ± 0.18 <sup>a</sup>  | 2.67 ± 0.14 <sup>ab</sup>  | 2.53 ± 0.14 <sup>ab</sup>  | 2.29 ± 0.16 <sup>b</sup>   | 2.21 ± 0.13 <sup>b</sup>   |

Different superscripts indicate significant differences between groups ( $p \leq 0.05$ ).
